# Supplementary material
Source: PubMed Central journal article supplement (PMC7825482)
Supplement: cvaa003_supplementary_tables.pdf [file cvaa003_supplementary_tables.pdf]

## Supplementary Tables

### ESC Working Group on Coronary Pathophysiology & Microcirculation Position paper on 'Coronary Microvascular Dysfunction in Cardiovascular Disease'

*Short title: Coronary Microvascular Dysfunction*

**Teresa Padro<sup>1#</sup>, Olivia Manfrini<sup>2#</sup>, Raffaele Bugiardini<sup>2</sup>, John Canty<sup>3</sup>, Edina Cenko<sup>2</sup>, Giuseppe De Luca<sup>4</sup>, Dirk J Duncker<sup>5</sup>, Etto C Eringa<sup>6</sup>, Akos Koller<sup>7,8</sup>, Dimitris Tousoulis<sup>9</sup>, Danijela Trifunovic<sup>10</sup>, Marija Vavlukis<sup>11</sup>, Cor de Wit<sup>12</sup>, Lina Badimon<sup>1\*</sup>**

*# Both authors have contributed equally*

#### **Authors affiliations:**

<sup>1</sup> Cardiovascular Program-ICCC, Research Institute Hospital Santa Creu i Sant Pau; CiberCV-Institute Carlos III; UAB, Barcelona, Spain

<sup>2</sup> Department of Experimental, Diagnostic and Specialty Medicine, University of Bologna, Bologna, Italy

<sup>3</sup> Division of Cardiology, Department of Medicine, State University of New York at Buffalo, Buffalo, New York, USA

<sup>4</sup> Maggiore della Carità Hospital, Eastern Piedmont University A. Avogadro, Novara, Italy

<sup>5</sup> Division of Experimental Cardiology, Department of Cardiology, Thoraxcenter, Cardiovascular Research Institute COEUR, Erasmus University Medical Center, Rotterdam, The Netherlands

<sup>6</sup> Department of Physiology, Amsterdam Cardiovascular Science Institute, Amsterdam University Medical Centres, Amsterdam, The Netherlands

<sup>7</sup> Department of Translational Medicine, Faculty of Medicine, Semmelweis University, Budapest, Hungary

<sup>8</sup> Department of Physiology, New York Medical College, Valhalla, NY, USA

<sup>9</sup> First Department of Cardiology, Hippokration Hospital, University of Athens Medical School, Athens, Greece

<sup>10</sup>Department of Cardiology, University Clinical Center of Serbia; and School of Medicine, University of Belgrade, Belgrade, Serbia

<sup>11</sup>University Clinic of Cardiology, Faculty of Medicine, University Ss' Cyril and Methodius, Skopje, Macedonia

<sup>12</sup>Institut für Physiologie, Universität zu Lübeck and Deutsches Zentrum für Herz-Kreislauf-Forschung (DZHK), Lübeck, Germany

**Address for corresponding author (\*):**

Prof. Lina Badimon  
Cardiovascular-Program ICCC;  
Research Institute Hospital Santa Creu i Sant Pau  
Sant Antoni M<sup>a</sup> Claret 167, 08025 Barcelona, Spain.  
**Phone:** +34.935565882.  
**Fax:** +34.935565559.  
**E-mail:** lbadimon@santpau.cat

**Supplementary Table 1.- Prevalance of non-obstructive CAD and “normal” angiograms in large cohorts of stable patients**

| References                                                        | Registry            | Period  | Patients with non-obstructive angiograms |                             |                              | Patients with “normal” angiograms |                 | “normal” (% lumen stenosis) |
|-------------------------------------------------------------------|---------------------|---------|------------------------------------------|-----------------------------|------------------------------|-----------------------------------|-----------------|-----------------------------|
|                                                                   |                     |         | All n/N (%)                              | Women n/N (%)               | Men n/N (%)                  | Woman n/N (%)                     | Men n/N (%)     |                             |
| <b>0 to &lt;50% lumen stenosis in any major coronary arteries</b> |                     |         |                                          |                             |                              |                                   |                 |                             |
| Sharaf BL et al. <sup>1</sup>                                     | WISE (USA) §        | 1996-99 | 184/323 (57.0)                           | 184/323 (57.0)              | ---                          | 110/ 323 (34)                     | ---             | 0 to <20 §                  |
| Gulati M et al. <sup>2</sup>                                      | WISE (USA) §        | 1997-99 | 540/936 (57.7)                           | 540/936 (57.7)              | ---                          | 318/936 (34)                      | ---             | 0 to <20 §                  |
| Jespersen et al. <sup>3</sup>                                     | Danish registry *   | 1998-09 | 5183/11223 (46.2)                        | 3073/4711 (65.2)            | 2110/6512 (32.4)             | 2253/4711(48)                     | 1226/6512 (19)  | 0 †                         |
| Sedlak TL et al. <sup>4</sup>                                     | Canadian registry † | 1999-02 | 3087/13695 (22.5)                        | 1757/4184 (42.0)            | 1330/9511 (14.0)             | 1275/4184 (31)                    | 804/9511 (8.5)  | 0 *                         |
| Sharaf BL et al. <sup>5</sup>                                     | WISE (USA) §        | 2001-07 | 567/917 (61.8)                           | 567/917 (61.8)              | ---                          | 339/917 (37)                      | --              | 0 to <20 §                  |
| Johnston et al. <sup>6</sup>                                      | SCAAR (Sweden) †    | 2005-10 | 11127/31742 (35.1)                       | 4517/13116 (34.4)           | 6610/18626 (35.5)            |                                   |                 |                             |
| Kissel et al. <sup>7</sup>                                        | SCAAR (Sweden) †    | 1995-12 | 7478/18384 (40.7)                        | 3517/6031 (58.3)            | 3961/12353 (32.1)            |                                   |                 |                             |
| <b>Total number of observations - n/N (%)</b>                     |                     |         | <b>28166 / 77220 (36.5)</b>              | <b>14155 / 30218 (46.8)</b> | <b>14011 / 47002 (29.8)</b>  |                                   |                 |                             |
| <b>[% min - % max]</b>                                            |                     |         | <b>[22.6 – 61.8]</b>                     | <b>[34.4-65.2]</b>          | <b>[14.0-35.5]</b>           |                                   |                 |                             |
| <b>0 to &lt;70% lumen stenosis in any major coronary arteries</b> |                     |         |                                          |                             |                              |                                   |                 |                             |
| Shaw LJ et al. <sup>8</sup>                                       | NCDR (USA) †        | 2000-02 | 155305/375896 (41.3)                     | 86186/168332 (51.2)         | 69119/207564 (33.3)          |                                   |                 |                             |
| Maddox TM et al. <sup>9</sup>                                     | US Veterans (USA) * | 2007-12 | 16775/37674 (44.5)                       | 1310/1666 (78.6)            | 15465/36008 (42.9)           | 935/1666 (56)                     | 7456/36008 (21) | 0 to <20 *                  |
| Davis MB et al. <sup>10</sup>                                     | US Veterans (USA) * | 2007-12 | 23696/48441 (48.9)                       | 1689/2132 (79.2)            | 22007/46309 (47.5)           | 1065/2132 (50)                    | 8534/46309 (18) | 0 to <20 *                  |
| <b>Total number of observations - n/N (%)</b>                     |                     |         | <b>195776 /462011 (42.4)</b>             | <b>89185/172130 (51.8)</b>  | <b>106591/ 289881 (36.8)</b> |                                   |                 |                             |
| <b>[% min - % max]</b>                                            |                     |         | <b>[41.3-48.9]</b>                       | <b>[51.2-79.2]</b>          | <b>[33-48]</b>               |                                   |                 |                             |

§ quantitative coronary analysis; † visual analysis; \* method used for angiograms evaluation not available

NCDR: National Cardiovascular Data Registry; SCAAR: Swedish Coronary Angiography and Angioplasty Registry; WISE: Women’s Ischemia Syndrome Evaluation.

**Supplementary Table 2.- Prevalence of non-obstructive CAD (<50% lumen stenosis in any major coronary artery) in large cohorts of ACS patients**

| Reference                                     | Registry/Trial and/or Country | Disease | Period  | All<br>n / N (%)            | Women<br>n / N (%)           | Men<br>n / N (%)            | n-W in n-All<br>(%) |
|-----------------------------------------------|-------------------------------|---------|---------|-----------------------------|------------------------------|-----------------------------|---------------------|
| Ramanath <sup>11</sup>                        | Michigan, USA                 | ACS     | 1999-04 | 123 / 2264 (5.4)            | 66 / 734 (9.0)               | 57 / 1530 (3.7)             | 53.7                |
| Germing <sup>12</sup>                         | Germany                       | ACS     | 1996-00 | 76 / 897 (8.5)              | 22 / 236 (9.3)               | 54 / 661 (8.2)              | 28.9                |
| Dey <sup>13</sup>                             | GRACE                         | ACS     | 1999-06 | 2031 / 26755 (7.6)          | 921 / 7638 (12.1)            | 1110 / 19117 (5.8)          | 45.3                |
| Manfrini <sup>14</sup>                        | EMMANANCE, UK†                | ACS     | 2003-04 | 350 / 1602 (21.8)           | 114 / 555 (20.5)             | 236 / 1047 (22.5)           | 32.6                |
| Sun <sup>15</sup>                             | Beijing, China†               | ACS     | 2007-08 | 51 / 729 (7.0)              | 20 / 215 (9.3)               | 31 / 514 (6.0)              | 39.2                |
| Rossini <sup>16</sup>                         | Bergamo, Italy                | ACS     | 2009    | 318 / 2438 (13.0)           |                              |                             |                     |
| <b>Total number of observations - n/N (%)</b> |                               |         |         | <b>2949 / 34685 (8.5)</b>   | <b>1143 / 9378 (12.2)</b>    | <b>1448 / 22869 (6.5)</b>   | <b>43.4</b>         |
| <b>[% min - % max]</b>                        |                               |         |         | <b>[5.4-21.8]</b>           | <b>[9.0- 20.5]</b>           | <b>[3.7-22.5]</b>           |                     |
| Larsen <sup>17</sup>                          | APPROACH, Canada§             | MINOCA  | 1999-00 | 725 / 9796 (7.4)            | 283 / 2530 (11.2)            | 442 / 7266 (6.1)            | 39.0                |
| Bainey <sup>18</sup>                          | APPROACH, Canada              | MINOCA  | 2002-14 | 2092 / 35928 (5.8)          | 1108 / n.a. (n.a.)           | 984 / n.a. (n.a.)           | 53.0                |
| Frycz-Kurek <sup>19</sup>                     | PL-ACS, Poland                | MINOCA  | 2003-06 | 972 / 32959 (2.9)           |                              |                             |                     |
| Agewall <sup>20</sup>                         | SMINC, Sweden                 | MINOCA  | 2003    | 11 / 152 (7.2)              | 9 / 27 (33.3)                | 2 / 125 (1.6)               | 81.8                |
| Lindah <sup>21</sup>                          | SWEDEHEART, Sweden            | MINOCA  | 2003-13 | 9466 / 118260 (8.0)         |                              |                             |                     |
| Baccouche <sup>22</sup>                       | Stuttgart, Germany            | MINOCA  | 2004-07 | 162 / 1174 (13.8)           |                              |                             |                     |
| André <sup>23</sup>                           | FAST-MI, France               | MINOCA  | 2005    | 167 / 2582 (6.5)            | 73 / 719 (10.2)              | 94 / 1863 (5.2)             | 43.7                |
| Kang <sup>24</sup>                            | KAMIR, Korea                  | MINOCA  | 2005-06 | 372 / 8510 (4.4)            | 146 / 2445 (6.0)             | 226 / 6065 (3.7)            | 39.2                |
| Johnston <sup>6</sup>                         | SCAAR, Sweden†                | MINOCA  | 2005-10 | 13172 / 95846 (13.7)        | 7333 / 32489 (22.6)          | 5839 / 63357 (9.2)          | 55.7                |
| Rhew <sup>25</sup>                            | Chonnam, Korea                | MINOCA  | 2006-08 | 100 / 1220 (8.2)            | 41 / 353 (11.6)              | 59 / 867 (6.8)              | 41.0                |
| Smilowitz <sup>26</sup>                       | ACTION, USA                   | MINOCA  | 2007-14 | 18918 / 322523 (5.9)        | 11763 / 112547 (10.5)        | 7155 / 209976 (3.4)         | 62.2                |
| Hamdan <sup>38</sup>                          | Beirut, Lebanon               | MINOCA  | 2008-09 | 11 / 124 (8.9)              | 7 / 31 (22.6)                | 4 / 93 (4.3)                | 63.6                |
| Hjort <sup>27</sup>                           | SWEDEHEART, Sweden            | MINOCA  | 2009-13 | 1639 / 18943 (8.7)          | 1050 / 6125 (17.1)           | 589 / 12818 (4.6)           | 64.1                |
| Baron <sup>28</sup>                           | SWEDEHEART, Sweden            | MINOCA  | 2011-13 | 3533 / 41817 (8.4)          | 2086 / 12863 (16.2)          | 1447 / 28954 (5.0)          | 59.0                |
| <b>Total number of observations - n/N (%)</b> |                               |         |         | <b>51340 / 689834 (7.4)</b> | <b>23899 / 170129 (14.0)</b> | <b>16841 / 331384 (5.1)</b> | <b>58.7%</b>        |
| <b>[% min - % max]</b>                        |                               |         |         | <b>[2.9-13.8]</b>           | <b>[6.0-33.3]</b>            | <b>[1.6-9.2]</b>            |                     |
| Larson <sup>29</sup>                          | Minneapolis, USA              | STEMI   | 2003-06 | 127 / 1335 (9.5)            | 52 / 381 (13.6)              | 75 / 954 (7.9)              | 40.9                |
| Johnston <sup>6</sup>                         | SCAAR, Sweden                 | STEMI   | 2005-10 | 2268 / 31648 (7.2)          | 976 / 9612 (10.2)            | 1292 / 22036 (5.9)          | 43.0                |
| Smilowitz <sup>26</sup>                       | ACTION, USA                   | STEMI   | 2007-14 | 3204 / 146003 (2.2)         | 1611 / 44969 (3.6)           | 1593 / 101034 (1.6)         | 50.3                |
| Andersson <sup>30</sup>                       | Denmark                       | STE-ACS | 2009-14 | 554 / 4793 (11.6)           | 212 / 1313 (16.1)            | 342 / 3480 (9.8)            | 38.3                |
| <b>Total number of observations - n/N (%)</b> |                               |         |         | <b>6153 / 183779 (3.3)</b>  | <b>2851 / 56275 (5.1)</b>    | <b>3302 / 127504 (2.6)</b>  | <b>46.3%</b>        |
| <b>[% min - % max]</b>                        |                               |         |         | <b>[2.2-11.6]</b>           | <b>[3.6-16.1]</b>            | <b>[1.6-9.8]</b>            |                     |

| Reference                                     | Registry/Trial and/or Country | Disease  | Period  | All n / N (%)                | Women n / N (%)              | Men n / N (%)               | n-W in n-All (%) |
|-----------------------------------------------|-------------------------------|----------|---------|------------------------------|------------------------------|-----------------------------|------------------|
| Patel <sup>31</sup>                           | CRUSADE                       | NSTEMI   | 2001-03 | 3306 / 38301 (8,6)           | 1873 / 14261 (13,1)          | 1433 / 24040 (6,0)          | 56,7             |
| Gehrie <sup>32</sup>                          | CRUSADE                       | NSTEMI   | 2001-05 | 4903 / 51608 (9,5)           | 2882 / 19602 (14,7)          | 2021 / 32006 (6,3)          | 58,8             |
| Planer <sup>33</sup>                          | ACUITY Trial §                | NSTEMI   | 2003-05 | 197 / 2442 (8,1)             | 105 / 824 (12,7)             | 92 / 1618 (5,7)             | 53,3             |
| Johnston <sup>6</sup>                         | SCAAR, Sweden                 | NSTEMI   | 2005-10 | 10904 / 64198 (17,0)         | 6357 / 22877 (27,8)          | 4547 / 41321 (11,0)         | 58,3             |
| Smilowitz <sup>26</sup>                       | ACTION, USA                   | NSTEMI   | 2007-14 | 15714 / 176520 (8,9)         | 10152 / 67578 (15,0)         | 5562 / 108942 (5,1)         | 64,6             |
| <b>Total number of observations - n/N (%)</b> |                               |          |         | <b>35024 / 333069 (10.5)</b> | <b>21369 / 125142 (17.1)</b> | <b>13655 / 207927 (6.6)</b> | <b>61.0%</b>     |
| [% min - % max]                               |                               |          |         | [8.1-17.0]                   | [12.7-27.8]                  | [5.7-11.0]                  |                  |
| De Ferrari <sup>34</sup>                      | n. 8 TIMI Trial               | NSTE-ACS | 1994-08 | 3550 / 37101 (9,6)           | 1974 / 11823 (16,7)          | 1576 / 25278 (6,2)          | 55,6             |
| Roe <sup>35</sup>                             | PURSUIT Trial                 | NSTE-ACS | 1995-97 | 696 / 5767 (12,1)            | 346 / 1862 (18,6)            | 350 / 3905 (9,0)            | 49,7             |
| Bugiardini <sup>36</sup>                      | n. 3 TIMI Trial               | NSTE-ACS | 1996-01 | 701 / 7656 (9,2)             |                              |                             |                  |
| Glaser <sup>37</sup>                          | TIMI 18 Trial                 | NSTE-ACS | 1997-99 | 194 / 1646 (11,8)            | 95 / 555 (17,1)              | 99 / 1091 (9,1)             | 49,0             |
| Gehrie <sup>32</sup>                          | CRUSADE                       | NSTE-ACS | 2001-05 | 5538 / 55514 (10,0)          | 3221 / 21294 (15,1)          | 2317 / 34220 (6,8)          | 58,2             |
| Mega <sup>38</sup>                            | TIMI 36 Trial                 | NSTE-ACS | 2004-07 | 461 / 3920 (11,8)            | 225 / 1162 (19,4)            | 236 / 2758 (8,6)            | 48,8             |
| <b>Total number of observations - n/N (%)</b> |                               |          |         | <b>11140 / 111604 (10.0)</b> | <b>5861 / 36696 (16)</b>     | <b>4578 / 67252 (6.8)</b>   | <b>56.2%</b>     |
| [% min - % max]                               |                               |          |         | [9.2-12.1]                   | [15.1-19.4]                  | [6.2-9.1]                   |                  |

§ = angiograms evaluation by quantitative coronary analysis

ACTION: Registry-GWTG, Acute Coronary Treatment and Intervention Outcomes Network Registry - Get With the Guidelines;

APPROACH: Alberta Provincial Project for Outcome Assessment in Coronary Heart disease;

CASPAR: Coronary Artery Spasm in Patients with Acute Coronary Syndrome;

EMMANCE: Evaluation of Methods and Management of Acute Coronary Events;

FAST-MI: French registry of Acute ST-elevation or non-ST-elevation Myocardial Infarction;

GENESIS-PRAXY: Gender and Sex Determinants of Cardiovascular Disease: From Bench to Beyond Premature Acute Coronary Syndrome;

GRACE: Global Registry of Acute Coronary Events;

KAMIR: Korean Acute Myocardial Infarction Registry;

SCAAR: Swedish Coronary Angiography and Angioplasty Registry;

SMINC: Stockholm Myocardial Infarction with Normal Coronaries.

**Supplementary Table 3.- Diagnostic evaluation of coronary microcirculation**

| Technique                                   | Characteristics                                                                                                                                                                                                                                                                                                                                                                                                                                                                                                                                                                                                                                                                         | Strength & Weakness                                                                                                                                                                                                                                               |
|---------------------------------------------|-----------------------------------------------------------------------------------------------------------------------------------------------------------------------------------------------------------------------------------------------------------------------------------------------------------------------------------------------------------------------------------------------------------------------------------------------------------------------------------------------------------------------------------------------------------------------------------------------------------------------------------------------------------------------------------------|-------------------------------------------------------------------------------------------------------------------------------------------------------------------------------------------------------------------------------------------------------------------|
| <b><i>Non-invasive diagnostic tests</i></b> |                                                                                                                                                                                                                                                                                                                                                                                                                                                                                                                                                                                                                                                                                         |                                                                                                                                                                                                                                                                   |
| <b>SPECT</b>                                | <p>SPECT and PET use a radioactive tracer to assess the activity of the myocardial tissue, revealing areas of decreased MBF.</p> <p>In dynamic SPECT imaging, radionuclide tracers such as <sup>99m</sup>Tc-tetroboxime which exhibit linear uptake with flow allows more accurate assessment of MBF than <sup>99m</sup>Tc-sestamibi, <sup>99m</sup>Tc-tetrofosmin or Thallium-201.</p>                                                                                                                                                                                                                                                                                                 | <p>SPECT has worse spatial and temporal resolution than PET and is associated with more radiation exposure due to the shorter half-life of PET tracers.</p>                                                                                                       |
| <b>PET</b>                                  | <p>The gold-standard tracers for quantification of MBF are the following.<sup>39</sup></p> <p><sup>15</sup>O-water is the ideal perfusion agent with 100% first-pass perfusion; its myocardial uptake is proportional to MBF, but due to its rapid clearance it cannot be used for visual analysis.<sup>40</sup></p> <p><sup>13</sup>N-ammonia diffuses across cell membranes and gets metabolically trapped in myocardial cells, but its trapping becomes rate-limiting at high MBF.<sup>40</sup></p> <p>Rubidium-82 based tracers have the advantage of not requiring an on-site cyclotron, but they come with the disadvantage of significant roll-off at high MBF.<sup>39</sup></p> | <p>The main disadvantage of PET imaging is the limited clinical availability and its high cost</p> <p>Image co-registration with the anatomical information of CT scan offers better anatomical resolution and delineation of myocardial tissue.<sup>40</sup></p> |
| <b>MCE</b>                                  | <p>Microbubbles are employed for the quantification of MBF.<sup>41</sup> Microbubbles are infused iv at a constant rate to achieve steady-state concentration and then destroyed by acoustic waves. Changes of echo-signal are used to determine MBF. CFR is calculated analyzing pulse wave Doppler in the LAD artery at baseline and under hyperemic conditions (e.g. post-adenosine).<sup>41</sup> in the absence of significant epicardial disease, CFR value &lt;2.0 is indicative of microvascular dysfunction.</p>                                                                                                                                                               | <p>MCE has been widely used in clinical studies, but is technically demanding, requires relevant expertise and a slow-learning curve and may not be feasible in all patients.<sup>40</sup></p>                                                                    |
| <b>CMR</b>                                  | <p>Perfusion CMR assesses the presence of perfusion defects due to epicardial stenoses or microvascular disease. Early or late gadolinium enhancement can be used to show the presence of microvascular obstruction in patients with ACS pre- or post-reperfusion.<sup>42</sup> Other newer CMR techniques, such as stress T1 mapping, may be superior to gadolinium based first-pass perfusion for assessing microvascular function.<sup>42</sup></p>                                                                                                                                                                                                                                  | <p>Its use is increasing in clinical practice, although slowed by high costs.</p>                                                                                                                                                                                 |
| <b>CCT</b>                                  | <p>Dynamic CCT imaging and myocardial attenuation gradients (endocardial versus epicardial) can be used to assess microvascular function after pharmacological vasodilation e.g. by adenosine infusion.<sup>43</sup></p>                                                                                                                                                                                                                                                                                                                                                                                                                                                                | <p>Its use is increasing in clinical practice, although slowed by the use of high dose radiation.</p>                                                                                                                                                             |

| Technique                               | Characteristics                                                                                                                                                                                                                                                                                                                                                                                                                                                                                                                     | Strength & Weakness                                                                                                                                                                                                                |
|-----------------------------------------|-------------------------------------------------------------------------------------------------------------------------------------------------------------------------------------------------------------------------------------------------------------------------------------------------------------------------------------------------------------------------------------------------------------------------------------------------------------------------------------------------------------------------------------|------------------------------------------------------------------------------------------------------------------------------------------------------------------------------------------------------------------------------------|
| <b><i>Invasive diagnostic tests</i></b> |                                                                                                                                                                                                                                                                                                                                                                                                                                                                                                                                     |                                                                                                                                                                                                                                    |
| <b>Coronary angiography</b>             | Widely used in ischemic heart disease, it helps physicians to decide on eventual additional local therapies to improve myocardial perfusion. After successful revascularization of an epicardial coronary stenosis, contrast medium progression impairment could reflect microcirculation damage. Several semiquantitative or quantitative indices have been validated for determining the degree of myocardial perfusion. The most common are TIMI flow grade, corrected TFC, <sup>44</sup> MBG, <sup>45</sup> TMPG. <sup>46</sup> | Limitations are represented by:<br>1) semiquantitative assessment;<br>2) restriction to epicardial flow evaluation of TIMI flow grade and corrected TFC;<br>3) interindividual high variability in the assessment of TMPG and MBG. |
| <b>Doppler-flow wire.</b>               | Coronary blood flow is measured by means of an intracoronary Doppler-tipped guidewire. <sup>47</sup> The Doppler guidewire transmits and receives pulsed wave ultrasound signals. The wire is plugged into an external console, which analyze signals for calculating flow velocity. Characteristic of coronary microvascular obstruction are systolic flow reversal, rapid deceleration of diastolic flow (< 600 msec) and a reduced coronary flow velocity reserve.                                                               | The good point is the quantitative assessment and good reproducibility. Limitation are a potential signal instability and difficulty in guidewire positioning in complex anatomy.                                                  |
| <b>CFR</b>                              | The most frequent evaluation of CFR is during cardiac catheterization. CFR is ratio between resting and maximal possible coronary blood flow (hyperemia). It assesses the capacity of coronary circulation to dilate and thus increase MBF. The coronary flow velocity pattern for microcirculation impairment is defined as a diastolic deceleration time <600 ms.                                                                                                                                                                 | CFR interrogates the overall coronary circulation without distinction between macro- and microcirculation. Other imitations are 1) high measurement variability; 2) during ACS the resting condition is highly questionable.       |
| <b>Thermodilution</b>                   | It is a novel index based on thermodilution background. <sup>48</sup> This technique uses a pressure/temperature wire and an infusion microcatheter. It has already been evaluated in vivo and in vitro.                                                                                                                                                                                                                                                                                                                            | The good point is the quantitative assessment and good reproducibility. Limitations are a potential signal instability and difficulty in guidewire positioning in complex anatomy.                                                 |
| <b>IMR</b>                              | IMR is the ratio of distal coronary pressure and the thermodilution-derived mean transit time during maximal hyperemia, measured with a pressure/temperature wire.<br>IMR measures the resistance to myocardial flow, specifically related to the coronary microcirculation compartment.                                                                                                                                                                                                                                            | IMR is an objective index dedicated to the coronary microcirculation. It has some degree of variability in the measurements resulting from the manual injection of an intracoronary bolus of saline at room temperature.           |

ACS= acute coronary syndrome; CCT= cardiac computed tomography; CFR= coronary flow reserve; CMR = cardiac magnetic resonance; IMR= index of microvascular resistance; LAD= left anterior descending; MBF=myocardial blood flow; MBG= myocardial blush grade; MCE= myocardial contrast echocardiography; PET = positron emission tomography; SPECT= single-photon emission computed tomography; TIMI = Thrombolysis in Myocardial Infarction; TFC= TIMI frame count; TMPG= TIMI Myocardial Perfusion Grade.

## References

1. Sharaf BL, Pepine CJ, Kerensky RA, Reis SE, Reichek N, Rogers WJ, Sopko G, Kelsey SF, Holubkov R, Olson M, Miele NJ, Williams DO, Merz CN, WISE Study Group. Detailed angiographic analysis of women with suspected ischemic chest pain (pilot phase data from the NHLBI-sponsored Women's Ischemia Syndrome Evaluation [WISE] Study Angiographic Core Laboratory). *Am J Cardiol* 2001;**87**:937–941; A3.
2. Gulati M, Cooper-DeHoff RM, McClure C, Johnson BD, Shaw LJ, Handberg EM, Zineh I, Kelsey SF, Arnsdorf MF, Black HR, Pepine CJ, Merz CNB. Adverse Cardiovascular Outcomes in Women With Nonobstructive Coronary Artery Disease. *Arch Intern Med* 2009;**169**:843.
3. Jespersen L, Hvelplund A, Abildstrøm SZ, Pedersen F, Galatius S, Madsen JK, Jørgensen E, Kelbæk H, Prescott E. Stable angina pectoris with no obstructive coronary artery disease is associated with increased risks of major adverse cardiovascular events. *Eur Heart J* 2012;**33**:734–744.
4. Sedlak TL, Lee M, Izadnegahdar M, Merz CNB, Gao M, Humphries KH. Sex differences in clinical outcomes in patients with stable angina and no obstructive coronary artery disease. *Am Heart J* 2013;**166**:38–44.
5. Sharaf B, Wood T, Shaw L, Johnson BD, Kelsey S, Anderson RD, Pepine CJ, Bairey Merz CN. Adverse outcomes among women presenting with signs and symptoms of ischemia and no obstructive coronary artery disease: findings from the National Heart, Lung, and Blood Institute-sponsored Women's Ischemia Syndrome Evaluation (WISE) angiographic core lab. *Am Heart J* 2013;**166**:134–141.
6. Johnston N, Jönelid B, Christersson C, Kero T, Renlund H, Schenck-Gustafsson K, Lagerqvist B. Effect of Gender on Patients With ST-Elevation and Non-ST-Elevation Myocardial Infarction Without Obstructive Coronary Artery Disease. *Am J Cardiol* 2015;**115**:1661–1666.
7. Kissel CK, Chen G, Southern DA, Galbraith PD, Anderson TJ. Impact of clinical presentation and presence of coronary sclerosis on long-term outcome of patients with non-obstructive coronary artery disease. *BMC Cardiovasc Disord* 2018;**18**:173.
8. Shaw LJ, Shaw RE, Merz CNB, Brindis RG, Klein LW, Nallamothu B, Douglas PS, Krone RJ, McKay CR, Block PC, Hewitt K, Weintraub WS, Peterson ED, American College of Cardiology-National Cardiovascular Data Registry Investigators. Impact of ethnicity and gender differences on angiographic coronary artery disease prevalence and in-hospital mortality in the American College of Cardiology-National Cardiovascular Data Registry. *Circulation* 2008;**117**:1787–1801.
9. Maddox TM, Stanislawski MA, Grunwald GK, Bradley SM, Ho PM, Tsai TT, Patel MR, Sandhu A, Valle J, Magid DJ, Leon B, Bhatt DL, Fihn SD, Rumsfeld JS. Nonobstructive coronary artery disease and risk of myocardial infarction. *JAMA* 2014;**312**:1754–1763.
10. Davis MB, Maddox TM, Langner P, Plomondon ME, Rumsfeld JS, Duvernoy CS. Characteristics and Outcomes of Women Veterans Undergoing Cardiac Catheterization in the Veterans Affairs Healthcare System: Insights from the VA CART Program. *Circ Cardiovasc Qual Outcomes* 2015;**8**:S39–S47.
11. Ramanath VS, Armstrong DF, Grzybowski M, Rahnema-Mohagdam S, Tamhane UU, Gordon K, Froehlich JB, Eagle KA, Jackson EA. Receipt of cardiac medications upon discharge among men and  
*ESC Working Group on Coronary Pathophysiology & Microcirculation. Position paper on 'Coronary Microvascular Dysfunction in Cardiovascular Disease'*



women with acute coronary syndrome and nonobstructive coronary artery disease. *Clin Cardiol* 2010;**33**:36–41.

12. Germing A, Lindstaedt M, Ulrich S, Grewe P, Bojara W, Lawo T, Dryander S von, Jäger D, Machraoui A, Mügge A, Lemke B. Normal angiogram in acute coronary syndrome-preangiographic risk stratification, angiographic findings and follow-up. *Int J Cardiol* 2005;**99**:19–23.
13. Dey S, Flather MD, Devlin G, Brieger D, Gurfinkel EP, Steg PG, Fitzgerald G, Jackson EA, Eagle KA, Global Registry of Acute Coronary Events investigators. Sex-related differences in the presentation, treatment and outcomes among patients with acute coronary syndromes: the Global Registry of Acute Coronary Events. *Heart* 2009;**95**:20–26.
14. Manfrini O, Morrell C, Das R, Barth JH, Hall AS, Gale CP, Cenko E, Bugiardini R, Evaluation of Methods and Management of Acute Coronary Events Study Group. Effects of angiotensin-converting enzyme inhibitors and beta blockers on clinical outcomes in patients with and without coronary artery obstructions at angiography (from a Register-Based Cohort Study on Acute Coronary Syndromes). *Am J Cardiol* 2014;**113**:1628–1633.
15. Sun J, Zhang W, Zeng Q, Dong S, Sun X. Three-year follow-up in patients with acute coronary syndrome and normal coronary angiography. *Coron Artery Dis* 2012;**23**:162–166.
16. Rossini R, Capodanno D, Lettieri C, Musumeci G, Limbruno U, Molfese M, Spatari V, Calabria P, Romano M, Tarantini G, Gavazzi A, Angiolillo DJ. Long-term outcomes of patients with acute coronary syndrome and nonobstructive coronary artery disease. *Am J Cardiol* 2013;**112**:150–155.
17. Larsen AI, Galbraith PD, Ghali WA, Norris CM, Graham MM, Knudtson ML, APPROACH Investigators. Characteristics and outcomes of patients with acute myocardial infarction and angiographically normal coronary arteries. *Am J Cardiol* 2005;**95**:261–263.
18. Baine KR, Welsh RC, Alemayehu W, Westerhout CM, Traboulsi D, Anderson T, Brass N, Armstrong PW, Kaul P. Population-level incidence and outcomes of myocardial infarction with non-obstructive coronary arteries (MINOCA): Insights from the Alberta contemporary acute coronary syndrome patients invasive treatment strategies (COAPT) study. *Int J Cardiol* 2018;**264**:12–17.
19. Frycz-Kurek AM, Gierlotka M, Gąsior M, Wilczek K, Lekston A, Kalarus Z, Poloński L. Patients with no significant lesions in coronary arteries and ST-segment elevation myocardial infarction have worse outcome than patients with non-ST-segment elevation myocardial infarction: analysis from PL-ACS Registry. *Kardiol Pol* 2010;**68**:1211–1217.
20. Agewall S, Daniel M, Eurenus L, Ekenbäck C, Skeppholm M, Malmqvist K, Hofman-Bang C, Collste O, Frick M, Henareh L, Jernberg T, Tornvall P. Risk factors for myocardial infarction with normal coronary arteries and myocarditis compared with myocardial infarction with coronary artery stenosis. *Angiology* 2012;**63**:500–503.
21. Lindahl B, Baron T, Erlinge D, Hadziosmanovic N, Nordenskjöld A, Gard A, Jernberg T. Medical Therapy for Secondary Prevention and Long-Term Outcome in Patients With Myocardial Infarction With Nonobstructive Coronary Artery Disease. *Circulation* 2017;**135**:1481–1489.
22. Baccouche H, Mahrholdt H, Meinhardt G, Merher R, Voehringer M, Hill S, Klingel K, Kandolf R, Sechtem U, Yilmaz A. Diagnostic synergy of non-invasive cardiovascular magnetic resonance and invasive endomyocardial biopsy in troponin-positive patients without coronary artery disease. *Eur*

*Heart J* 2009;**30**:2869–2879.

23. André R, Elbaz M, Simon T, Khalife K, Lim P, Ennezat P-V, Coste P, Breton H Le, Bataille V, Ferrières J, Danchin N. Prevalence, clinical profile and 3-year survival of acute myocardial infarction patients with and without obstructive coronary lesions: the FAST-MI 2005 registry. *Int J Cardiol* 2014;**172**:e247-9.
24. Kang WY, Jeong MH, Ahn YK, Kim JH, Chae SC, Kim YJ, Hur SH, Seong IW, Hong TJ, Choi DH, Cho MC, Kim CJ, Seung KB, Chung WS, Jang YS, Rha SW, Bae JH, Cho JG, Park SJ, Korea Acute Myocardial Infarction Registry Investigators. Are patients with angiographically near-normal coronary arteries who present as acute myocardial infarction actually safe? *Int J Cardiol* 2011;**146**:207–212.
25. Rhew SH, Ahn Y, Kim MC, Jang SY, Cho KH, Hwang SH, Lee MG, Ko JS, Park KH, Sim DS, Yoon NS, Yoon HJ, Kim KH, Hong YJ, Park HW, Kim JH, Jeong MH, Cho JG, Park JC, Kang JC. Is Myocardial Infarction in Patients without Significant Stenosis on a Coronary Angiogram as Benign as Believed? *Chonnam Med J* 2012;**48**:39.
26. Smilowitz NR, Mahajan AM, Roe MT, Hellkamp AS, Chiswell K, Gulati M, Reynolds HR. Mortality of Myocardial Infarction by Sex, Age, and Obstructive Coronary Artery Disease Status in the ACTION Registry-GWTG (Acute Coronary Treatment and Intervention Outcomes Network Registry-Get With the Guidelines). *Circ Cardiovasc Qual Outcomes* 2017;**10**:e003443.
27. Hjort M, Lindahl B, Baron T, Jernberg T, Tornvall P, Eggers KM. Prognosis in relation to high-sensitivity cardiac troponin T levels in patients with myocardial infarction and non-obstructive coronary arteries. *Am Heart J* 2018;**200**:60–66.
28. Baron T, Hambraeus K, Sundström J, Erlinge D, Jernberg T, Lindahl B, TOTAL-AMI study group. Impact on Long-Term Mortality of Presence of Obstructive Coronary Artery Disease and Classification of Myocardial Infarction. *Am J Med* 2016;**129**:398–406.
29. Larson DM, Menssen KM, Sharkey SW, Duval S, Schwartz RS, Harris J, Meland JT, Unger BT, Henry TD. “False-positive” cardiac catheterization laboratory activation among patients with suspected ST-segment elevation myocardial infarction. *JAMA* 2007;**298**:2754–2760.
30. Andersson HB, Pedersen F, Engstrøm T, Helqvist S, Jensen MK, Jørgensen E, Kelbæk H, Räder SBEW, Saunamäki K, Bates E, Grande P, Holmvang L, Clemmensen P. Long-term survival and causes of death in patients with ST-elevation acute coronary syndrome without obstructive coronary artery disease. *Eur Heart J* 2018;**39**:102–110.
31. Patel MR, Chen AY, Peterson ED, Newby LK, Pollack C V., Brindis RG, Gibson CM, Kleiman NS, Saucedo JF, Bhatt DL, Gibler WB, Ohman EM, Harrington RA, Roe MT. Prevalence, predictors, and outcomes of patients with non-ST-segment elevation myocardial infarction and insignificant coronary artery disease: Results from the Can Rapid risk stratification of Unstable angina patients Suppress ADverse outcomes with Early. *Am Heart J* 2006;**152**:641–647.
32. Gehrie ER, Reynolds HR, Chen AY, Neelon BH, Roe MT, Gibler WB, Ohman EM, Newby LK, Peterson ED, Hochman JS. Characterization and outcomes of women and men with non-ST-segment elevation myocardial infarction and nonobstructive coronary artery disease: results from the Can Rapid Risk Stratification of Unstable Angina Patients Suppress Adverse Outcomes with Early. *Am Heart J* 2009;**158**:688–694.

33. Planer D, Mehran R, Ohman EM, White HD, Newman JD, Xu K, Stone GW. Prognosis of patients with non-ST-segment-elevation myocardial infarction and nonobstructive coronary artery disease: propensity-matched analysis from the Acute Catheterization and Urgent Intervention Triage Strategy trial. *Circ Cardiovasc Interv* 2014;**7**:285–293.
34. Ferrari GM De, Fox KA, White JA, Giugliano RP, Tricoci P, Reynolds HR, Hochman JS, Gibson CM, Thérroux P, Harrington RA, Werf F Van de, White HD, Califf RM, Newby LK. Outcomes among non-ST-segment elevation acute coronary syndromes patients with no angiographically obstructive coronary artery disease: observations from 37,101 patients. *Eur Hear J Acute Cardiovasc Care* 2014;**3**:37–45.
35. Roe MT, Harrington RA, Prosper DM, Pieper KS, Bhatt DL, Lincoff AM, Simoons ML, Akkerhuis M, Ohman EM, Kitt MM, Vahanian A, Ruzyllo W, Karsch K, Califf RM, Topol EJ. Clinical and therapeutic profile of patients presenting with acute coronary syndromes who do not have significant coronary artery disease. The Platelet Glycoprotein IIb/IIIa in Unstable Angina: Receptor Suppression Using Integrilin Therapy (PURSUIT) Trial. *Circulation* 2000;**102**:1101–1106.
36. Bugiardini R, Manfrini O, Ferrari GM De. Unanswered Questions for Management of Acute Coronary Syndrome. *Arch Intern Med* 2006;**166**:1391.
37. Glaser R, Herrmann HC, Murphy SA, Demopoulos LA, DiBattiste PM, Cannon CP, Braunwald E. Benefit of an early invasive management strategy in women with acute coronary syndromes. *JAMA* 2002;**288**:3124–3129.
38. Mega JL, Hochman JS, Scirica BM, Murphy SA, Sloan S, McCabe CH, Merlino P, Morrow DA. Clinical features and outcomes of women with unstable ischemic heart disease: observations from metabolic efficiency with ranolazine for less ischemia in non-ST-elevation acute coronary syndromes-thrombolysis in myocardial infarction 36 (MERLIN-TIMI 36). *Circulation* 2010;**121**:1809–1817.
39. Zobel EH, Winther SA, Hasbak P, Scholten BJ von, Holmvang L, Kjaer A, Rossing P, Hansen TW. Myocardial flow reserve assessed by cardiac 82Rb positron emission tomography/computed tomography is associated with albumin excretion in patients with Type 1 diabetes. *Eur Heart J Cardiovasc Imaging* 2019;**20**:796–803.
40. Feher A, Sinusas AJ. Quantitative Assessment of Coronary Microvascular Function: Dynamic Single-Photon Emission Computed Tomography, Positron Emission Tomography, Ultrasound, Computed Tomography, and Magnetic Resonance Imaging. *Circ Cardiovasc Imaging* 2017;**10**:e006427.
41. Rigo F, Sicari R, Gherardi S, Djordjevic-Dikic A, Cortigiani L, Picano E. The additive prognostic value of wall motion abnormalities and coronary flow reserve during dipyridamole stress echo. *Eur Heart J* 2008;**29**:79–88.
42. Liu A, Wijesurendra RS, Liu JM, Greiser A, Jerosch-Herold M, Forfar JC, Channon KM, Piechnik SK, Neubauer S, Kharbanda RK, Ferreira VM. Gadolinium-Free Cardiac MR Stress T1-Mapping to Distinguish Epicardial From Microvascular Coronary Disease. *J Am Coll Cardiol* 2018;**71**:957–968.
43. Hedgire S, Baliyan V, Zucker EJ, Bittner DO, Staziaki P V, Takx RAP, Scholtz J-E, Meyersohn N, Hoffmann U, Ghoshhajra B. Perivascular Epicardial Fat Stranding at Coronary CT Angiography: A Marker of Acute Plaque Rupture and Spontaneous Coronary Artery Dissection. *Radiology* 2018;**287**:808–815.

44. Gibson CM, Cannon CP, Daley WL, Dodge JT, Alexander B, Marble SJ, McCabe CH, Raymond L, Fortin T, Poole WK, Braunwald E. TIMI frame count: a quantitative method of assessing coronary artery flow. *Circulation* 1996;**93**:879–888.
45. Luca G De, 't Hof AWJ van, Ottervanger JP, Hoorntje JCA, Gosselink ATM, Dambrink J-HE, Zijlstra F, Boer M-J de, Suryapranata H. Unsuccessful reperfusion in patients with ST-segment elevation myocardial infarction treated by primary angioplasty. *Am Heart J* 2005;**150**:557–562.
46. Gibson CM, Cannon CP, Murphy SA, Ryan KA, Mesley R, Marble SJ, McCabe CH, Werf F Van De, Braunwald E. Relationship of TIMI myocardial perfusion grade to mortality after administration of thrombolytic drugs. *Circulation* 2000;**101**:125–130.
47. Joye JD, Schulman DS, Lasorda D, Farah T, Donohue BC, Reichek N. Intracoronary Doppler guide wire versus stress single-photon emission computed tomographic thallium-201 imaging in assessment of intermediate coronary stenoses. *J Am Coll Cardiol* 1994;**24**:940–947.
48. Williams RP, Waard GA de, Silva K De, Lumley M, Asrress K, Arri S, Ellis H, Mir A, Clapp B, Chiribiri A, Plein S, Teunissen PF, Hollander MR, Marber M, Redwood S, Royen N van, Perera D. Doppler Versus Thermodilution-Derived Coronary Microvascular Resistance to Predict Coronary Microvascular Dysfunction in Patients With Acute Myocardial Infarction or Stable Angina Pectoris. *Am J Cardiol* 2018;**121**:1–8.
